## Correction

# Correction: Risk Factors for Development of Hemolytic Uremic Syndrome in a Cohort of Adult Patients with STEC 0104:H4 Infection

## The PLOS ONE Staff

The first two authors, Alexander Zoufaly and Jakob P. Cramer, should be noted as having contributed equally to the article.

In addition, a funding organization and grant are incorrectly omitted from the Funding statement. The following sentence should be included with the Funding statement: “This research was funded by a grant from the German Ministry of Health (BMG).”

## Reference

1. Zoufaly A, Cramer JP, Vettorazzi E, Sayk F, Bremer JP, et al. (2013) Risk Factors for Development of Hemolytic Uremic Syndrome in a Cohort of Adult Patients with STEC 0104:H4 Infection. PLoS ONE 8(3): e59209. doi:10.1371/journal.pone.0059209

---

**Citation:** The PLOS ONE Staff (2014) Correction: Risk Factors for Development of Hemolytic Uremic Syndrome in a Cohort of Adult Patients with STEC 0104:H4 Infection. PLoS ONE 9(3): e91617. doi:10.1371/journal.pone.0091617

**Published:** March 7, 2014

**Copyright:** © 2014 The PLOS ONE Staff. This is an open-access article distributed under the terms of the Creative Commons Attribution License, which permits unrestricted use, distribution, and reproduction in any medium, provided the original author and source are credited.
